# Supplementary material for: Human Cytochrome P450 1, 2, 3 Families as Pharmacogenes with Emphases on Their Antimalarial and Antituberculosis Drugs and Prevalent African Alleles
Source: MDPI journal article supplement (doi:10.3390/ijms24043383), 2023-02-08
Supplement: s1 [file s1]

## **Supplementary Material**

### **Human cytochrome P450 1, 2, 3 families as pharmacogenes with emphases on their antimalarial and antituberculosis drugs and prevalent African alleles**

Chiratidzo R. Chamboko<sup>1,†</sup>, Wayde Veldman<sup>1,†</sup>, Rolland Bantar Tata<sup>1</sup>, Birgit Schoeberl<sup>2</sup> and Özlem Tastan Bishop<sup>1,\*</sup>

<sup>1</sup>Research Unit in Bioinformatics (RUBi), Department of Biochemistry and Microbiology, Rhodes University, Makhanda/Grahamstown 6139, South Africa

<sup>2</sup>Novartis Institutes for BioMedical Research PK Sciences / Translational Medicine 220 Massachusetts Ave, Cambridge, MA 02139, USA

<sup>†</sup> Equally contributed first authorship

\*Corresponding author: Özlem Tastan Bishop (o.tastanbishop@ru.ac.za)

**KEYWORDS:** sequence and structure analysis; CYP metabolism; polymorphisms; SNPs; missense mutations; personalized medicine

## 1. Supplementary Figures

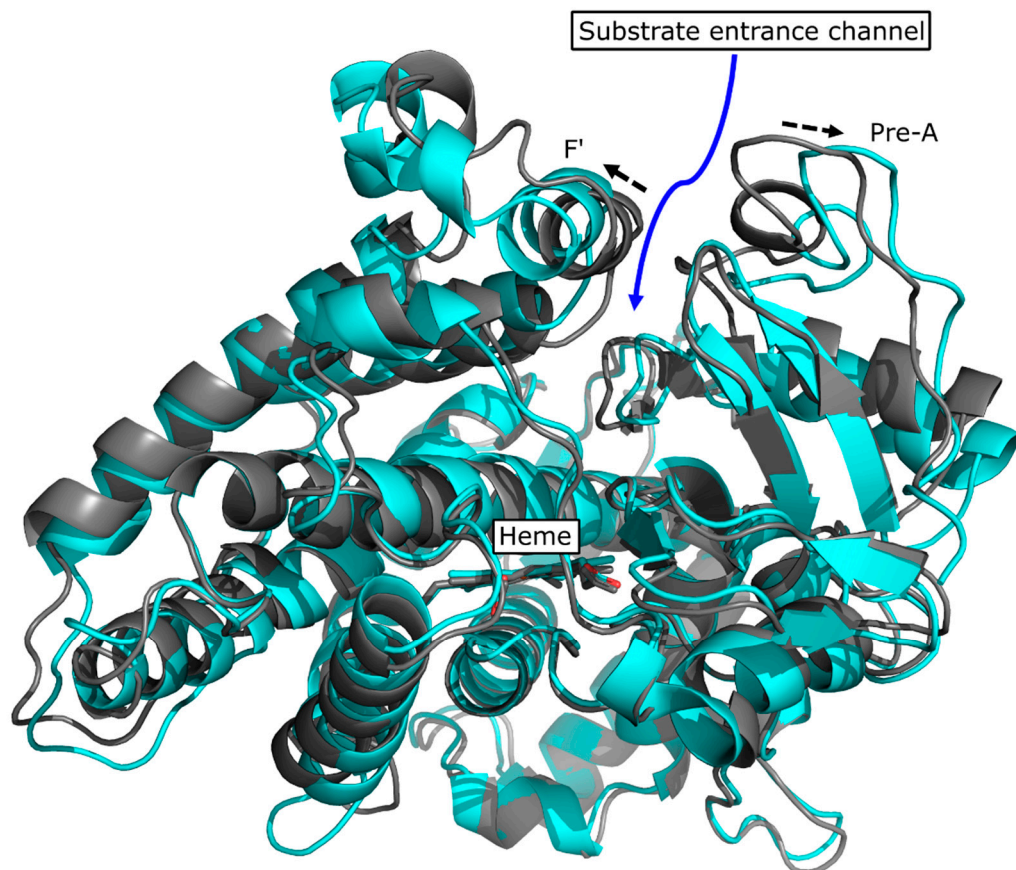

**Figure S1: Open and closed conformations of CYP2D6.** Open conformation of CYP2D6 structure in cyan from PDB (3TBG) superimposed onto closed conformation structure in grey (3QM4). Direction of displacement of F' and Pre-A regions to form the open structure is shown in dotted arrows.

## 2. Supplementary Tables

**Table S1:** 3D structures of enzymes from CYP 1, 2 and 3 enzyme families that are available on PDB with their respective resolutions and co-crystalized ligands as of November 2022.

| Family | Enzyme name          | PDB IDs | Resolution (Å) | Co-crystalised ligand                                                                                                          |
|--------|----------------------|---------|----------------|--------------------------------------------------------------------------------------------------------------------------------|
| CYP 1  | CYP 1A1              | 4I8V    | 2.60           | Alpha-naphthylflavone                                                                                                          |
|        |                      | 6DWM    | 2.85           | Bergamottin                                                                                                                    |
|        |                      | 6UDL    | 2.85           | Duocarmycin Prodrug (S) ICT-2700                                                                                               |
|        |                      | 6DWN    | 3              | Erlotinib                                                                                                                      |
|        |                      | 6UDM    | 3.07           | Duocarmycin Prodrug (S) ICT-2700                                                                                               |
|        |                      | 6O5Y    | 3.17           | 5-amino-N-{5-[(4R,5R)-4-amino-5-fluoroazepan-1-yl]-1-methyl-1H-pyrazol-4-yl}-2-(2,6-difluorophenyl)-1,3-thiazole-4-carboxamide |
|        | CYP 1A2              | 2HI4    | 1.95           | Alpha-naphthylflavone                                                                                                          |
|        | CYP 1B1              | 3PM0    | 2.70           | Alpha-naphthylflavone                                                                                                          |
|        |                      | 6OYU    | 2.95           | Alpha-naphthylflavone                                                                                                          |
|        |                      | 6OYV    | 3.10           | Estradiol                                                                                                                      |
|        |                      | 6IQ5    | 3.70           | 2-(cis-4-azidocyclohexyl)-4H-naphtho[1,2-b]pyran-4-one                                                                         |
| CYP 2  | CYP 2A6 <sup>#</sup> | 2FDV    | 1.65           | N-Methyl(5-(pyridin-3-yl)furan-2-yl)methanamine                                                                                |
|        |                      | 2FDU    | 1.85           | N,N-Dimethyl(5-(pyridin-3-yl)furan-2-yl)methanamine                                                                            |
|        |                      | 1Z10    | 1.90           | Coumarin                                                                                                                       |
|        |                      | 2FDY    | 1.95           | Adriethiol                                                                                                                     |
|        |                      | 2PG5    | 1.95           | -                                                                                                                              |
|        |                      | 2FDW    | 2.05           | 5-(Pyridin-3-yl)furan-2-yl)methanamine                                                                                         |
|        |                      | 1Z11    | 2.05           | Methoxsalen                                                                                                                    |
|        |                      | 3T3Q    | 2.10           | Pilocarpine                                                                                                                    |
|        |                      | 3EBS    | 2.15           | Phenacetin                                                                                                                     |
|        |                      | 4EJJ    | 2.30           | Nicotine                                                                                                                       |
|        | CYP 2A7              | -       | -              | -                                                                                                                              |
|        | CYP 2A13             | 4EJI    | 2.10           | 4-(methylnitrosamino)-1-(3-pyridyl)-1-butanone                                                                                 |
|        |                      | 2P85    | 2.35           | Indole                                                                                                                         |
|        |                      | 4EJH    | 2.35           | 4-(methylnitrosamino)-1-(3-pyridyl)-1-butanone                                                                                 |
|        |                      | 4EJG    | 2.50           | Nicotine                                                                                                                       |
|        |                      | 3T3S    | 3.00           | Pilocarpine                                                                                                                    |
|        |                      |         |                |                                                                                                                                |
|        | CYP 2B6 <sup>#</sup> | 5UFG    | 1.76           | Myrtenyl bromide                                                                                                               |
|        |                      | 5UDA    | 1.93           | Camphane                                                                                                                       |
|        |                      | 4I91    | 2.00           | Alpha-pinene                                                                                                                   |
|        |                      | 3IBD    | 2.00           | 4-(4-chlorophenyl)imidazole                                                                                                    |
|        |                      | 5UAP    | 2.03           | Bornyl bromide                                                                                                                 |
|        |                      | 4RQL    | 2.10           | Sabinene                                                                                                                       |

|                      |      |      |                                                                                                                                                                                                   |
|----------------------|------|------|---------------------------------------------------------------------------------------------------------------------------------------------------------------------------------------------------|
|                      | 3QOA | 2.10 | 4-Benzylpyridine                                                                                                                                                                                  |
|                      | 4RRT | 2.20 | (+)-3-carene                                                                                                                                                                                      |
|                      | 4ZV8 | 2.24 | Alpha-pinene                                                                                                                                                                                      |
|                      | 5UEC | 2.27 | Myrtenyl bromide                                                                                                                                                                                  |
| CYP 2C8              | 2NNJ | 2.28 | Felodipine                                                                                                                                                                                        |
|                      | 2NNH | 2.60 | 9-cis-retinoic acid                                                                                                                                                                               |
|                      | 1PQ2 | 2.70 | -                                                                                                                                                                                                 |
|                      | 2VN0 | 2.70 | Troglitazone                                                                                                                                                                                      |
|                      | 2NNI | 2.80 | Montelukast                                                                                                                                                                                       |
| CYP 2C9 <sup>#</sup> | 5X23 | 2.00 | Losartan                                                                                                                                                                                          |
|                      | 5W0C | 2.00 | Ethyl 2-[[[1,3]thiazolo[4,5-c]pyridine-2-carbonyl)amino]thiophene-3-carbonyl]carbamate                                                                                                            |
|                      | 1R9O | 2.00 | Flurbiprofen                                                                                                                                                                                      |
|                      | 5A5I | 2.00 | N-[4-(3-chloranyl-4-cyano-phenoxy)cyclohexyl]-1,1,1-tris(fluoranyl)methanesulfonamide                                                                                                             |
|                      | 7RL2 | 2.23 | Losartan                                                                                                                                                                                          |
|                      | 5XXI | 2.30 | Losartan                                                                                                                                                                                          |
|                      | 5K7K | 2.30 | 4-[4-chloranyl-2-(1~{H})-pyrazol-4-yl)phenoxy]-3-cyano~{N}-(1,3-thiazol-2-yl)benzenesulfonamide (2R)-N-{4-[(3-bromophenyl)sulfonyl]-2-chlorophenyl}-3,3,3-trifluoro-2-hydroxy-2-methylpropanamide |
|                      | 4NZ2 | 2.45 | Losartan                                                                                                                                                                                          |
|                      | 5X24 | 2.48 | S-warfarin                                                                                                                                                                                        |
|                      | 1OG5 | 2.55 |                                                                                                                                                                                                   |
| CYP 2C18             | -    | -    | -                                                                                                                                                                                                 |
| CYP 2C19             | 4GQS | 2.87 | (4-hydroxy-3,5-dimethylphenyl)(2-methyl-1-benzofuran-3-yl)methanone                                                                                                                               |
| CYP 2D6 <sup>#</sup> | 3TBG | 2.10 | Thioridazine                                                                                                                                                                                      |
|                      | 4WNU | 2.26 | Quinidine                                                                                                                                                                                         |
|                      | 4WNV | 2.35 | Quinine                                                                                                                                                                                           |
|                      | 6CSD | 2.39 | Prinomastat                                                                                                                                                                                       |
|                      | 6CSB | 2.39 | Thioridazine                                                                                                                                                                                      |
|                      | 4XRZ | 2.40 | (4aR,6R,8aS)-8a-(2,4-difluorophenyl)-6-(1H-pyrazol-4-yl)-4,4a,5,6,8,8a-hexahydropyrano[3,4-d][1,3]thiazin-2-amine                                                                                 |
|                      | 4XRY | 2.50 | (4aR,6R,8aS)-8a-(2,4-difluorophenyl)-6-(1-methyl-1H-pyrazol-4-yl)-4,4a,5,6,8,8a-hexahydropyrano[3,4-d][1,3]thiazin-2-amine                                                                        |
|                      | 4WNT | 2.60 | Ajmalicine                                                                                                                                                                                        |
|                      | 3TDA | 2.67 | Prinomastat                                                                                                                                                                                       |
|                      | 5TFT | 2.71 | (4S)-4-[2,4-difluoro-5-([1-(trifluoromethyl)cyclopropyl)amino]methyl)phenyl]-4-methyl-5,6-dihydro-4H-1,3-thiazin-2-amine                                                                          |
| CYP 2E1              | 3E6I | 2.20 | 1H-indazole                                                                                                                                                                                       |
|                      | 3T3Z | 2.35 | Pilocarpine                                                                                                                                                                                       |
|                      | 3E4E | 2.60 | 4-methylpyrazole                                                                                                                                                                                  |
|                      | 3GPH | 2.70 | Omega-imidazolyl-decanoic acid                                                                                                                                                                    |
|                      | 3KOH | 2.90 | Omega-imidazolyl octanoic acid                                                                                                                                                                    |

|              |                      |      |      |                                                                                                                             |
|--------------|----------------------|------|------|-----------------------------------------------------------------------------------------------------------------------------|
|              |                      | 3LC4 | 3.10 | Omega-imidazolyl-dodecanoic Acid                                                                                            |
|              | CYP 2F1              | -    | -    | -                                                                                                                           |
|              | CYP 2J2              | -    | -    | -                                                                                                                           |
|              | CYP 2R1              | 3CZH | 2.30 | Vitamin D2                                                                                                                  |
|              |                      | 3DL9 | 2.72 | 1-alpha-hydroxy-vitamin D2                                                                                                  |
|              |                      | 3C6G | 2.80 | Vitamin D3                                                                                                                  |
|              | CYP 2S1              | -    | -    | -                                                                                                                           |
|              | CYP 2U1              | -    | -    | -                                                                                                                           |
|              | CYP2W1               | -    | -    | -                                                                                                                           |
| <b>CYP 3</b> | CYP 3A4 <sup>#</sup> | 5VCC | 1.70 | -                                                                                                                           |
|              |                      | 6MA8 | 1.83 | Phenylmethylsulfonyl fluoride                                                                                               |
|              |                      | 4D6Z | 1.93 | Tert-butyl {6-oxo-6-[(pyridin-3-ylmethyl)amino]hexyl}carbamate and Imidazole                                                |
|              |                      | 5VCD | 1.95 | -                                                                                                                           |
|              |                      | 3NXU | 2.00 | Ritonavir                                                                                                                   |
|              |                      | 1TQN | 2.05 | -                                                                                                                           |
|              |                      | 6MA7 | 2.09 | Fluconazole                                                                                                                 |
|              |                      | 3UA1 | 2.15 | Bromoergocryptine                                                                                                           |
|              |                      | 6DAA | 2.15 | Tert-butyl [(2S)-1-[[[(2R)-1-oxo-3-phenyl-1-[(pyridin-3-yl)methyl]amino]propan-2-yl]sulfanyl]-3-phenylpropan-2-yl]carbamate |
|              |                      | 6MA6 | 2.18 | Metyrapone                                                                                                                  |
|              | CYP 3A5              | 6MJM | 2.20 | -                                                                                                                           |
|              |                      | 7SV2 | 2.46 | Azamulin                                                                                                                    |
|              |                      | 7LAD | 2.65 | Clobetasol propionate                                                                                                       |
|              |                      | 5VEU | 2.91 | Ritonavir                                                                                                                   |
|              | CYP 3A7              | 7MK8 | 2.15 | Dithiothreitol                                                                                                              |
|              | CYP 3A43             | -    | -    | -                                                                                                                           |

<sup>#</sup> -CYP enzymes with more than 10 structures on PDB (for the table a cut-off of 10 structures with the best resolution was used).

**Table S2: Cytochrome P450 enzymes from families 1, 2 and 3 associated with metabolism of antimalarial and antituberculosis drugs with their alleles and amino acid mutation positions.**

| <b>CYP family</b> | <b>CYP enzyme</b> | <b>Antimalarial/antituberculosis drug affected</b> | <b>Allele name</b> | <b>Amino acid mutation position</b> |
|-------------------|-------------------|----------------------------------------------------|--------------------|-------------------------------------|
| <b>CYP 1</b>      | CYP1A1            | Bedaquiline                                        | CYP1A1*4           | T461N                               |
|                   |                   |                                                    | CYP1A1*5           | R464S                               |
|                   |                   |                                                    | CYP1A1*6           | M331I                               |
|                   |                   |                                                    | CYP1A1*8           | I448N                               |
|                   |                   |                                                    | CYP1A1*9           | R464C                               |
|                   |                   |                                                    | CYP1A1*10          | R477W                               |
|                   |                   |                                                    | CYP1A1*11          | P492R                               |
|                   |                   |                                                    | CYP1A1*12          | A62P                                |
|                   |                   |                                                    | CYP1A1*13          | G45D                                |
|                   | CYP1A2            | Mefloquine, primaquine                             | CYP1A2*2           | F21L                                |
|                   |                   |                                                    | CYP1A2*3           | D348N                               |
|                   |                   |                                                    | CYP1A2*4           | I386F                               |
|                   |                   |                                                    | CYP1A2*5           | C406Y                               |
|                   |                   |                                                    | CYP1A2*6           | R431W                               |
|                   |                   |                                                    | CYP1A2*8           | R456H                               |
|                   |                   |                                                    | CYP1A2*9           | T83M                                |
|                   |                   |                                                    | CYP1A2*10          | E168Q                               |
|                   |                   |                                                    | CYP1A2*11          | F186L                               |
|                   |                   |                                                    | CYP1A2*12          | S212C                               |
|                   |                   |                                                    | CYP1A2*13          | G299S                               |
|                   |                   |                                                    | CYP1A2*14          | T438I                               |
|                   |                   |                                                    | CYP1A2*15          | P42R                                |
|                   |                   |                                                    | CYP1A2*16          | R377Q                               |
|                   |                   |                                                    | CYP1A2*17          | T395M                               |
|                   |                   |                                                    | CYP1A2*18          | N397H                               |
|                   |                   |                                                    | CYP1A2*19          | R510Q                               |
|                   |                   |                                                    | CYP1A2*20          | D436N                               |
|                   | CYP1B1            | Linezolid                                          | CYP1B1*2           | R48G; A119S                         |
|                   |                   |                                                    | CYP1B1*3           | L432V                               |
|                   |                   |                                                    | CYP1B1*4           | N453S                               |
|                   |                   |                                                    | CYP1B1*5           | R48G; L432V                         |
|                   |                   |                                                    | CYP1B1*6           | R48G; A119S; L432V                  |
|                   |                   |                                                    | CYP1B1*7           | R48G; A119S; L432V; A443G           |
|                   |                   |                                                    | CYP1B1*8           | L432V; D441H                        |
|                   |                   |                                                    | CYP1B1*11          | W57C                                |
|                   |                   |                                                    | CYP1B1*12          | G61E                                |
|                   |                   |                                                    | CYP1B1*18          | G365W                               |
|                   |                   |                                                    | CYP1B1*19          | P379L                               |
|                   |                   |                                                    | CYP1B1*20          | E387K                               |

|              |        |                                       |           |                                                                                                                                                          |
|--------------|--------|---------------------------------------|-----------|----------------------------------------------------------------------------------------------------------------------------------------------------------|
|              |        |                                       | CYP1B1*21 | R390H                                                                                                                                                    |
|              |        |                                       | CYP1B1*23 | P437L                                                                                                                                                    |
|              |        |                                       | CYP1B1*25 | R469W                                                                                                                                                    |
| <b>CYP 2</b> | CYP2A6 | Artemisinin, artesunate               | CYP2A6*2  | L160H                                                                                                                                                    |
|              |        |                                       | CYP2A6*5  | G479V                                                                                                                                                    |
|              |        |                                       | CYP2A6*6  | R128Q                                                                                                                                                    |
|              |        |                                       | CYP2A6*7  | I471T                                                                                                                                                    |
|              |        |                                       | CYP2A6*8  | R485L                                                                                                                                                    |
|              |        |                                       | CYP2A6*10 | I471T; R485L                                                                                                                                             |
|              |        |                                       | CYP2A6*11 | S224P                                                                                                                                                    |
|              |        |                                       | CYP2A6*13 | G5R                                                                                                                                                      |
|              |        |                                       | CYP2A6*14 | S29N                                                                                                                                                     |
|              |        |                                       | CYP2A6*15 | K194E                                                                                                                                                    |
|              |        |                                       | CYP2A6*16 | R203S                                                                                                                                                    |
|              |        |                                       | CYP2A6*17 | V365M                                                                                                                                                    |
|              |        |                                       | CYP2A6*18 | Y392F                                                                                                                                                    |
|              |        |                                       | CYP2A6*19 | Y392F; I471T                                                                                                                                             |
|              |        |                                       | CYP2A6*23 | R203C                                                                                                                                                    |
|              |        |                                       | CYP2A6*24 | V110L; N438Y                                                                                                                                             |
|              |        |                                       | CYP2A6*25 | F118L                                                                                                                                                    |
|              |        |                                       | CYP2A6*26 | F118L; R128L; S131A                                                                                                                                      |
|              |        |                                       | CYP2A6*28 | N418D; E419D                                                                                                                                             |
|              |        |                                       | CYP2A6*31 | M6L                                                                                                                                                      |
|              |        |                                       | CYP2A6*34 | M6L; V13A; K30R;<br>Q53H; M54I; Y55C;<br>N56D; L58I; I61F;<br>R64C; V117A; R128L;<br>S131A; A153S; D158E;<br>L160I; G162S; G164H;<br>K194E; R203S; M204V |
|              |        |                                       | CYP2A6*35 | N438Y                                                                                                                                                    |
|              |        |                                       | CYP2A6*36 | N438Y; I471T                                                                                                                                             |
|              |        |                                       | CYP2A6*37 | N438Y; I471T; R485L                                                                                                                                      |
|              |        |                                       | CYP2A6*38 | Y351H                                                                                                                                                    |
|              |        |                                       | CYP2A6*39 | V68M                                                                                                                                                     |
|              |        |                                       | CYP2A6*40 | I149M                                                                                                                                                    |
|              |        |                                       | CYP2A6*41 | R265Q                                                                                                                                                    |
|              |        |                                       | CYP2A6*42 | I268T                                                                                                                                                    |
|              |        |                                       | CYP2A6*43 | T303I                                                                                                                                                    |
|              |        |                                       | CYP2A6*44 | E390K; N418D; E419D                                                                                                                                      |
|              |        |                                       | CYP2A6*45 | L462P                                                                                                                                                    |
|              | CYP2B6 | Artemisinin,<br>artesunate, arteether | CYP2B6*2  | R22C                                                                                                                                                     |
|              |        |                                       | CYP2B6*3  | S259R                                                                                                                                                    |
|              |        |                                       | CYP2B6*4  | K262R                                                                                                                                                    |
|              |        |                                       | CYP2B6*5  | R487C                                                                                                                                                    |
|              |        |                                       | CYP2B6*6  | Q172H; K262R                                                                                                                                             |
|              |        |                                       | CYP2B6*7  | Q172H; K262R; R487C                                                                                                                                      |
|              |        |                                       | CYP2B6*8  | K139E                                                                                                                                                    |

|  |        |                                       |           |                                   |
|--|--------|---------------------------------------|-----------|-----------------------------------|
|  |        |                                       | CYP2B6*9  | Q172H                             |
|  |        |                                       | CYP2B6*10 | Q21L; R22C                        |
|  |        |                                       | CYP2B6*11 | M46V                              |
|  |        |                                       | CYP2B6*12 | G99E                              |
|  |        |                                       | CYP2B6*13 | K139E; Q172H; K262R               |
|  |        |                                       | CYP2B6*14 | R140Q                             |
|  |        |                                       | CYP2B6*15 | I391N                             |
|  |        |                                       | CYP2B6*16 | K262R; I328T                      |
|  |        |                                       | CYP2B6*17 | T26S; D28G; R29T                  |
|  |        |                                       | CYP2B6*18 | I328T                             |
|  |        |                                       | CYP2B6*19 | Q172H; K262R; R336C               |
|  |        |                                       | CYP2B6*20 | T168I; Q172H; K262R               |
|  |        |                                       | CYP2B6*21 | P428T                             |
|  |        |                                       | CYP2B6*23 | M459V                             |
|  |        |                                       | CYP2B6*24 | G476D                             |
|  |        |                                       | CYP2B6*25 | Q485L                             |
|  |        |                                       | CYP2B6*26 | P167A; Q172H; K262R               |
|  |        |                                       | CYP2B6*27 | M198T                             |
|  |        |                                       | CYP2B6*31 | L313I                             |
|  |        |                                       | CYP2B6*32 | A407T                             |
|  |        |                                       | CYP2B6*33 | R487S                             |
|  |        |                                       | CYP2B6*34 | Q172H; K262R; R487S               |
|  |        |                                       | CYP2B6*35 | G110V; I114T; E148D; M198T; A279P |
|  |        |                                       | CYP2B6*36 | Q172H; K262R                      |
|  |        |                                       | CYP2B6*37 | Q172H; V183G; K262R               |
|  | CYP2C8 | Chloroquine, amodiaquine, bedaquiline | CYP2C8*2  | I269F                             |
|  |        |                                       | CYP2C8*3  | R139K; K399R                      |
|  |        |                                       | CYP2C8*4  | I264M                             |
|  |        |                                       | CYP2C8*6  | G171S                             |
|  |        |                                       | CYP2C8*8  | R186G                             |
|  |        |                                       | CYP2C8*9  | K247R                             |
|  |        |                                       | CYP2C8*10 | K383N                             |
|  |        |                                       | CYP2C8*13 | I223M                             |
|  |        |                                       | CYP2C8*14 | A238P                             |
|  |        |                                       | CYP2C8*15 | V181I                             |
|  |        |                                       | CYP2C8*16 | I331T                             |
|  |        |                                       | CYP2C8*17 | I244V                             |
|  | CYP2C9 | Dapsone                               | CYP2C8*18 | L361F                             |
|  |        |                                       | CYP2C9*2  | R144C                             |
|  |        |                                       | CYP2C9*3  | I359L                             |
|  |        |                                       | CYP2C9*4  | I359L                             |
|  |        |                                       | CYP2C9*5  | D360E                             |
|  |        |                                       | CYP2C9*7  | L19I                              |
|  |        |                                       | CYP2C9*8  | R150H                             |
|  |        |                                       | CYP2C9*9  | H251R                             |
|  |        |                                       | CYP2C9*10 | E272G                             |
|  |        |                                       | CYP2C9*11 | R335W                             |



|  |  |           |              |
|--|--|-----------|--------------|
|  |  | CYP2C9*12 | P489S        |
|  |  | CYP2C9*13 | L90P         |
|  |  | CYP2C9*14 | R125H        |
|  |  | CYP2C9*16 | T299A        |
|  |  | CYP2C9*17 | P382S        |
|  |  | CYP2C9*18 | I359L; D397A |
|  |  | CYP2C9*19 | Q454H        |
|  |  | CYP2C9*20 | G70R         |
|  |  | CYP2C9*21 | P30L         |
|  |  | CYP2C9*22 | N41D         |
|  |  | CYP2C9*23 | V76M         |
|  |  | CYP2C9*24 | E354K        |
|  |  | CYP2C9*26 | T130R        |
|  |  | CYP2C9*27 | R150L        |
|  |  | CYP2C9*28 | Q214L        |
|  |  | CYP2C9*29 | P279T        |
|  |  | CYP2C9*30 | A477T        |
|  |  | CYP2C9*31 | I327T        |
|  |  | CYP2C9*32 | V490F        |
|  |  | CYP2C9*33 | R132Q        |
|  |  | CYP2C9*34 | R335Q        |
|  |  | CYP2C9*35 | R125L; R144C |
|  |  | CYP2C9*36 | M1V          |
|  |  | CYP2C9*37 | D49G         |
|  |  | CYP2C9*38 | G96A         |
|  |  | CYP2C9*39 | G98V         |
|  |  | CYP2C9*40 | F110S        |
|  |  | CYP2C9*41 | K119R        |
|  |  | CYP2C9*42 | R124Q        |
|  |  | CYP2C9*43 | R124W        |
|  |  | CYP2C9*44 | T130M        |
|  |  | CYP2C9*45 | R132W        |
|  |  | CYP2C9*46 | A149T        |
|  |  | CYP2C9*47 | P163L        |
|  |  | CYP2C9*48 | I207T        |
|  |  | CYP2C9*49 | I222V        |
|  |  | CYP2C9*50 | P227S        |
|  |  | CYP2C9*51 | I284V        |
|  |  | CYP2C9*52 | T299R        |
|  |  | CYP2C9*53 | P317S        |
|  |  | CYP2C9*54 | S343R        |
|  |  | CYP2C9*55 | L361I        |
|  |  | CYP2C9*56 | I387V        |
|  |  | CYP2C9*57 | N204H        |
|  |  | CYP2C9*58 | P337T        |
|  |  | CYP2C9*59 | I434F        |
|  |  | CYP2C9*60 | L467P        |
|  |  | CYP2C9*61 | R144C; N457S |

|  |         |                             |            |                    |
|--|---------|-----------------------------|------------|--------------------|
|  |         |                             | CYP2C9*62  | R125C              |
|  |         |                             | CYP2C9*63  | R144H              |
|  |         |                             | CYP2C9*64  | S280C              |
|  |         |                             | CYP2C9*65  | E326D              |
|  |         |                             | CYP2C9*66  | L362V              |
|  |         |                             | CYP2C9*67  | R433W              |
|  |         |                             | CYP2C9*69  | D191G              |
|  |         |                             | CYP2C9*70  | G442V              |
|  |         |                             | CYP2C9*71  | E272G; P489S       |
|  |         |                             | CYP2C9*72  | A149V              |
|  |         |                             | CYP2C9*73  | R150C              |
|  |         |                             | CYP2C9*74  | Q214H              |
|  |         |                             | CYP2C9*75  | N418T              |
|  |         |                             | CYP2C9*76  | G40R               |
|  |         |                             | CYP2C9*77  | G96R               |
|  |         |                             | CYP2C9*78  | L128R              |
|  |         |                             | CYP2C9*79  | P346L              |
|  |         |                             | CYP2C9*80  | C13G               |
|  |         |                             | CYP2C9*81  | E300V              |
|  |         |                             | CYP2C9*82  | P227L              |
|  |         |                             | CYP2C9*83  | L36F               |
|  |         |                             | CYP2C9*84  | G431R              |
|  | CYP2C18 | Bedaquiline                 | -          | -                  |
|  | CYP2C19 | Proguanil, quinine, dapsone | CYP2C19*1  | I331V              |
|  |         |                             | CYP2C19*4  | M1V; I331V         |
|  |         |                             | CYP2C19*5  | R433W              |
|  |         |                             | CYP2C19*6  | R132Q; I331V       |
|  |         |                             | CYP2C19*8  | W120R              |
|  |         |                             | CYP2C19*9  | R144H; I331V       |
|  |         |                             | CYP2C19*10 | P227L; I331V       |
|  |         |                             | CYP2C19*11 | R150H; I331V       |
|  |         |                             | CYP2C19*13 | I331V; R410C       |
|  |         |                             | CYP2C19*14 | L17P; I331V        |
|  |         |                             | CYP2C19*15 | I19L; I331V        |
|  |         |                             | CYP2C19*16 | R442C              |
|  |         |                             | CYP2C19*17 | I331V              |
|  |         |                             | CYP2C19*18 | R329H; I331V       |
|  |         |                             | CYP2C19*19 | S51G; I331V        |
|  |         |                             | CYP2C19*22 | R186P; I331V       |
|  |         |                             | CYP2C19*23 | G91R; I331V        |
|  |         |                             | CYP2C19*24 | I331V; R335Q       |
|  |         |                             | CYP2C19*25 | I331V; F448L       |
|  |         |                             | CYP2C19*26 | D256N; I331V       |
|  |         |                             | CYP2C19*28 | I19L; I331V; V374I |
|  |         |                             | CYP2C19*29 | K28I; I331V        |
|  |         |                             | CYP2C19*30 | R73C               |
|  |         |                             | CYP2C19*31 | H78Y; I331V        |
|  |         |                             | CYP2C19*32 | H99R; I331V        |

|  |        |             |            |                                                             |
|--|--------|-------------|------------|-------------------------------------------------------------|
|  |        |             | CYP2C19*33 | D188N; I331V                                                |
|  |        |             | CYP2C19*34 | P3S; F4L                                                    |
|  |        |             | CYP2C19*39 | I19L; E122A; I331V                                          |
|  | CYP2D6 | Chloroquine | CYP2D6*2   | R296C; S486T                                                |
|  |        |             | CYP2D6*7   | H324P                                                       |
|  |        |             | CYP2D6*10  | P34S; S486T                                                 |
|  |        |             | CYP2D6*12  | G42R; R296C; S486T                                          |
|  |        |             | CYP2D6*14  | G169R; R296C; S486T                                         |
|  |        |             | CYP2D6*17  | T107I; R296C; S486T                                         |
|  |        |             | CYP2D6*22  | R28C                                                        |
|  |        |             | CYP2D6*23  | A85V                                                        |
|  |        |             | CYP2D6*24  | I297L                                                       |
|  |        |             | CYP2D6*25  | R343G                                                       |
|  |        |             | CYP2D6*26  | I369T                                                       |
|  |        |             | CYP2D6*27  | E410K                                                       |
|  |        |             | CYP2D6*28  | V7M; Q151E; R296C; S486T                                    |
|  |        |             | CYP2D6*29  | V136I; R296C; V338M; S486T                                  |
|  |        |             | CYP2D6*31  | R296C; R440H; S486T                                         |
|  |        |             | CYP2D6*33  | A237S                                                       |
|  |        |             | CYP2D6*34  | R296C                                                       |
|  |        |             | CYP2D6*35  | V11M; R296C; S486T                                          |
|  |        |             | CYP2D6*36  | P34S; P469A; T470A; H478S; G479R; F481V; A482S; S486T       |
|  |        |             | CYP2D6*37  | P34S; R201H; S486T                                          |
|  |        |             | CYP2D6*39  | S486T                                                       |
|  |        |             | CYP2D6*43  | R26H                                                        |
|  |        |             | CYP2D6*45  | E155K; R296C; S486T                                         |
|  |        |             | CYP2D6*46  | R26H; E155K; R296C; S486T                                   |
|  |        |             | CYP2D6*47  | R25W; P34S; S486T                                           |
|  |        |             | CYP2D6*48  | A90V                                                        |
|  |        |             | CYP2D6*49  | P34S; F120I; S486T                                          |
|  |        |             | CYP2D6*50  | E156A                                                       |
|  |        |             | CYP2D6*51  | R296C; E334A; S486T                                         |
|  |        |             | CYP2D6*52  | P34S; E418K; S486T                                          |
|  |        |             | CYP2D6*53  | F120I; A122S                                                |
|  |        |             | CYP2D6*54  | P34S; T261I; S486T                                          |
|  |        |             | CYP2D6*55  | R296C; K404Q; S486T                                         |
|  |        |             | CYP2D6*57  | P34S; R62W; P469A; T470A; H478S; G479R; F481V; A482S; S486T |
|  |        |             | CYP2D6*62  | R441C                                                       |
|  |        |             | CYP2D6*64  | P34S; T107I; S486T                                          |
|  |        |             | CYP2D6*65  | P34S; R296C; S486T                                          |
|  |        |             | CYP2D6*70  | V119M; V136I; V338M; S486T                                  |

|  |  |            |                                             |
|--|--|------------|---------------------------------------------|
|  |  | CYP2D6*71  | G42E                                        |
|  |  | CYP2D6*72  | P34S; E383K; S486T                          |
|  |  | CYP2D6*73  | V104M; R296C; S486T                         |
|  |  | CYP2D6*74  | L91M                                        |
|  |  | CYP2D6*75  | R441H                                       |
|  |  | CYP2D6*82  | L91M; H94R; V104A;<br>T107Y; I109V          |
|  |  | CYP2D6*83  | P469A; T470A; H478S;<br>G479R; F481V; A482S |
|  |  | CYP2D6*84  | P267H; R296C; S486T                         |
|  |  | CYP2D6*85  | R296C; H478Q; S486T                         |
|  |  | CYP2D6*86  | E278K; M279K                                |
|  |  | CYP2D6*87  | A5V; P34S; S486T                            |
|  |  | CYP2D6*88  | V104A; S486T                                |
|  |  | CYP2D6*89  | L142S                                       |
|  |  | CYP2D6*90  | K147R                                       |
|  |  | CYP2D6*93  | T249P                                       |
|  |  | CYP2D6*94  | P34S; D337G; S486T                          |
|  |  | CYP2D6*95  | P34S; R388H; S486T                          |
|  |  | CYP2D6*97  | F457L                                       |
|  |  | CYP2D6*98  | R296C; H463D; S486T                         |
|  |  | CYP2D6*99  | P34S; R88P; S486T                           |
|  |  | CYP2D6*102 | A90V; R296C; S486T                          |
|  |  | CYP2D6*103 | A90V; N166D; R296C;<br>S486T                |
|  |  | CYP2D6*104 | E156V; R296C; S486T                         |
|  |  | CYP2D6*105 | R296C; F366S; S486T                         |
|  |  | CYP2D6*106 | E418K                                       |
|  |  | CYP2D6*107 | V136M                                       |
|  |  | CYP2D6*108 | H352R; Y355C                                |
|  |  | CYP2D6*110 | G445R                                       |
|  |  | CYP2D6*111 | G111S; R296C; S486T                         |
|  |  | CYP2D6*112 | S488F                                       |
|  |  | CYP2D6*113 | G439D                                       |
|  |  | CYP2D6*114 | P34S; G169R; R296C;<br>S486T                |
|  |  | CYP2D6*116 | R330P                                       |
|  |  | CYP2D6*117 | R296C; D337N; S486T                         |
|  |  | CYP2D6*118 | T310A                                       |
|  |  | CYP2D6*121 | N166D; H167Q; S168A;<br>R296C; S486T        |
|  |  | CYP2D6*122 | V370I                                       |
|  |  | CYP2D6*125 | R296C; R450H; S486T                         |
|  |  | CYP2D6*126 | S135F; R296C; S486T                         |
|  |  | CYP2D6*127 | Y355C; R365H                                |
|  |  | CYP2D6*128 | V68G; R296C; S486T                          |
|  |  | CYP2D6*130 | C191L                                       |
|  |  | CYP2D6*131 | L231P                                       |

|  |        |           |            |                                                                               |
|--|--------|-----------|------------|-------------------------------------------------------------------------------|
|  |        |           | CYP2D6*132 | P34S; N285S; S486T                                                            |
|  |        |           | CYP2D6*133 | R296C; G340R; S486T                                                           |
|  |        |           | CYP2D6*134 | R344Q                                                                         |
|  |        |           | CYP2D6*135 | R296C; R414C; S486T                                                           |
|  |        |           | CYP2D6*136 | R296C; P430L; S486T                                                           |
|  |        |           | CYP2D6*137 | R497H                                                                         |
|  |        |           | CYP2D6*139 | R365H                                                                         |
|  |        |           | CYP2D6*140 | L230F                                                                         |
|  |        |           | CYP2D6*141 | T107I; R296C; E410K;<br>P469A; T470A; H478S;<br>G479R; F481V; A482S;<br>S486T |
|  |        |           | CYP2D6*142 | R28C; P34S; S486T                                                             |
|  |        |           | CYP2D6*146 | R26H; R296C; S486T                                                            |
|  |        |           | CYP2D6*148 | R26H; R296C; E410K;<br>S486T                                                  |
|  |        |           | CYP2D6*149 | D97E; V136I; R296C;<br>V338M; S486T                                           |
|  |        |           | CYP2D6*150 | L213P; R296C; S486T                                                           |
|  |        |           | CYP2D6*151 | N175S                                                                         |
|  |        |           | CYP2D6*152 | A226V                                                                         |
|  |        |           | CYP2D6*153 | E215K                                                                         |
|  |        |           | CYP2D6*154 | T107I; R296C; R441H;<br>S486T                                                 |
|  |        |           | CYP2D6*155 | V136I; R296C; V338M;<br>M451I; S486T                                          |
|  |        |           | CYP2D6*157 | V136I; A165V; R296C;<br>V338M; S486T                                          |
|  |        |           | CYP2D6*159 | P41L; R296C; S486T                                                            |
|  |        |           | CYP2D6*160 | L91M; H94R; R296C;<br>S486T                                                   |
|  |        |           | CYP2D6*162 | R296C; 410K; S486T                                                            |
|  |        |           | CYP2D6*163 | W128R; R296C; S486T                                                           |
|  |        |           | CYP2D6*164 | V136I; S486T                                                                  |
|  |        |           | CYP2D6*165 | V136I; R173H; R296C;<br>V338M; S486T                                          |
|  |        |           | CYP2D6*167 | Q117R                                                                         |
|  |        |           | CYP2D6*168 | G42E; E196K                                                                   |
|  |        |           | CYP2D6*169 | E402L                                                                         |
|  |        |           | CYP2D6*170 | P430L                                                                         |
|  |        |           | CYP2D6*171 | V119M; V136I; R296C;<br>V338M; S486T                                          |
|  | CYP2J2 | Linezolid | CYP2J2*2   | T143A                                                                         |
|  |        |           | CYP2J2*3   | R158C                                                                         |
|  |        |           | CYP2J2*4   | I192N                                                                         |
|  |        |           | CYP2J2*5   | D342N                                                                         |
|  |        |           | CYP2J2*6   | N404Y                                                                         |
|  |        |           | CYP2J2*8   | G312R                                                                         |
|  |        |           | CYP2J2*9   | P351L                                                                         |

|              |        |                                                                                                                                                                          |           |       |
|--------------|--------|--------------------------------------------------------------------------------------------------------------------------------------------------------------------------|-----------|-------|
|              |        |                                                                                                                                                                          | CYP2J2*10 | P115L |
| <b>CYP 3</b> | CYP3A4 | Quinine, quinidine, chloroquine, mefloquine, primaquine, halofantrine, lumefantrine, dapsone, artemisinin, artemether, arteether, artelinic acid, bedaquiline, delaminid | CYP3A4*2  | S222P |
|              |        |                                                                                                                                                                          | CYP3A4*3  | M445T |
|              |        |                                                                                                                                                                          | CYP3A4*4  | I118V |
|              |        |                                                                                                                                                                          | CYP3A4*5  | P218R |
|              |        |                                                                                                                                                                          | CYP3A4*7  | G56D  |
|              |        |                                                                                                                                                                          | CYP3A4*8  | R130Q |
|              |        |                                                                                                                                                                          | CYP3A4*9  | V170I |
|              |        |                                                                                                                                                                          | CYP3A4*10 | D174H |
|              |        |                                                                                                                                                                          | CYP3A4*11 | T363M |
|              |        |                                                                                                                                                                          | CYP3A4*12 | L373F |
|              |        |                                                                                                                                                                          | CYP3A4*13 | P416L |
|              |        |                                                                                                                                                                          | CYP3A4*14 | L15P  |
|              |        |                                                                                                                                                                          | CYP3A4*15 | R162Q |
|              |        |                                                                                                                                                                          | CYP3A4*16 | T185S |
|              |        |                                                                                                                                                                          | CYP3A4*17 | F189S |
|              |        |                                                                                                                                                                          | CYP3A4*18 | L293P |
|              |        |                                                                                                                                                                          | CYP3A4*19 | P467S |
|              |        |                                                                                                                                                                          | CYP3A4*21 | Y319C |
|              |        |                                                                                                                                                                          | CYP3A4*23 | R162W |
|              |        |                                                                                                                                                                          | CYP3A4*24 | Q200H |
|              |        |                                                                                                                                                                          | CYP3A4*28 | L22V  |
|              |        |                                                                                                                                                                          | CYP3A4*29 | F113I |
|              |        |                                                                                                                                                                          | CYP3A4*31 | H324Q |
|              |        |                                                                                                                                                                          | CYP3A4*32 | I335T |
|              |        |                                                                                                                                                                          | CYP3A4*33 | A370S |
|              |        |                                                                                                                                                                          | CYP3A4*34 | I427V |
|              |        |                                                                                                                                                                          | CYP3A4*35 | L3V   |
|              | CYP3A5 | Chloroquine, halofantrine, lumefantrine, arteether, artelinic acid                                                                                                       | CYP3A5*8  | R28C  |
|              |        |                                                                                                                                                                          | CYP3A5*9  | A337T |
